## Latitude delineates patterns of biogeography in terrestrial *Streptomyces*

Mallory J Choudoir, James R Doroghazi, and Daniel H Buckley\*

School of Integrative Plant Sciences, Cornell University, Ithaca, NY 14853 USA

**\* Corresponding Author:** Daniel H Buckley  
[dbuckley@cornell.edu](mailto:dbuckley@cornell.edu)

**Running Title:** Biogeography of *Streptomyces*

**Subject Category:** Microbial population and community ecology

**Conflict of Interest:** None

## 1 **Abstract**

2 The evolutionary and ecological forces that govern microbial biogeography remain poorly  
3 characterized. We examined the biogeography of *Streptomyces* at regional spatial scales to  
4 identify factors that govern extant patterns of microbial diversity within the genus. *Streptomyces*  
5 are spore forming filamentous bacteria that are widespread in soil and are a predominant source  
6 of antibiotics. We applied population genetic approaches to analyze geographic and genetic  
7 population structure in six phylogroups of *Streptomyces* identified from a geographically explicit  
8 culture collection. *Streptomyces* strains were isolated from soils associated with perennial grass  
9 habitats sampled across a spatial scale of more than 5,000 km. We find that *Streptomyces* allelic  
10 diversity correlates with geographic distance and that gene flow between sites is constrained by  
11 latitude. In addition, we find that phylogroup nucleotide diversity is negatively correlated with  
12 latitude. These observations are consistent with the hypothesis that historical demographic  
13 processes have influenced the contemporary biogeography of *Streptomyces*.

14

## 15 **Introduction**

16 Widespread evidence documents microbial biogeography across varying spatial (Whitaker *et al.*,  
17 2003; Vos and Velicer, 2008; Bissett *et al.*, 2010; Martiny *et al.*, 2011) and temporal scales  
18 (Gilbert *et al.*, 2012; Hatosy *et al.*, 2013), yet we are only beginning to understand the  
19 evolutionary forces that generate and maintain these patterns. Explorations of biogeography are  
20 valuable because biogeographical patterns illustrate fundamental principles of evolution and  
21 ecology. One of the earliest and most well documented patterns of biogeography is the latitudinal  
22 diversity gradient (Wallace, 1878), and this trend of decreasing species richness with increasing  
23 latitude is widely described in plant and animal systems (Hillebrand, 2004). We examine the

24 biogeography of *Streptomyces* to determine whether a latitudinal diversity gradient can be  
25 observed in terrestrial bacteria and to evaluate the underlying mechanisms that govern  
26 biogeography within this genus.

27

28 Patterns of microbial biogeography are determined by rates of dispersal and diversification  
29 (Martiny *et al.*, 2006; Hanson *et al.*, 2012). Rates of dispersal can be difficult to quantify for  
30 microbes because dispersal that does not contribute to the genetic diversity of future populations  
31 remains undetected. Gene flow results from the transfer of genetic material between populations,  
32 and gene flow between geographically distinct populations requires dispersal. Hence, patterns of  
33 microbial dispersal are typically inferred from extant patterns of genetic diversity. It has been  
34 hypothesized that microbes disperse ubiquitously due to their small cell size and massive  
35 population numbers (Finlay, 2002; Finlay and Fenchel, 2004). For example, Gibbons *et al.*  
36 (2013) determined that a single sampling site in the English Channel could encapsulate the total  
37 expected diversity of the Earth's marine biosphere. Yet endemism and dispersal limitation have  
38 been observed for a range of microbes (Cho and Tiedge, 2000; Green and Bohannan, 2006;  
39 Telford *et al.*, 2006; Boucher *et al.*, 2011), and microbial dispersal limitation has been verified  
40 experimentally (Bell, 2010). Contrasting evidence for dispersal limitation in the literature can be  
41 explained by at least two factors: firstly, dispersal constraints are likely to vary between species  
42 and habitats; and secondly, the units used to define microbial diversity can vary dramatically in  
43 their phylogenetic resolution. Each of these factors has been discussed previously (Hanson *et al.*,  
44 2012; Choudoir *et al.*, 2012), and we will only consider them briefly here.

45

46 Patterns of microbial dispersal and gene flow appear to differ considerably between habitats and  
47 species. At one end of the spectrum, globally widespread marine microbes such as  
48 *Prochlorococcus* and *Pelagibacter* show little variation in gene content between the Atlantic and  
49 Pacific Oceans suggesting that high dispersal can homogenize genetic diversity in pelagic marine  
50 systems, while adaptation to regional habitats occurs within limited regions of the genome  
51 (Coleman and Chisholm, 2010). At the other end of the spectrum are extremophiles such as  
52 *Sulfolobus* and thermophilic *Synechococcus*, which live in island-like volcanic habitats and  
53 exhibit strong patterns of allopatric divergence resulting from dispersal limitation (Papke *et al.*,  
54 2003; Whitaker *et al.*, 2003). Both allopatric processes and local patterns of gene flow contribute  
55 to the biogeography and genetic diversity of *Sulfolobus* populations (Cadillo-Quiroz *et al.*,  
56 2012). Terrestrial microbes fall somewhere between these extremes. Soil dwelling microbes such  
57 as *Burkholderia pseudomallei*, *Burkholderia mallei*, and *Bacillus anthracis* exhibit  
58 biogeographical patterns governed by dispersal limitation at regional spatial scales (Kenefic *et*  
59 *al.*, 2009; Pearson *et al.*, 2009). For instance, the contemporary population structure of North  
60 American anthrax reflects historical migration across the Bering land bridge during the late  
61 Pleistocene followed by range expansion into the Southwestern United States and regional  
62 diversification due to drift (Kenefic *et al.*, 2009).

63  
64 The phylogenetic resolution at which microbial diversity is defined can have a profound impact  
65 on our ability to discern patterns of microbial biogeography (as reviewed Hanson *et al.*, 2012).  
66 Observations of microbial biogeography are often based upon variation in SSU rRNA gene  
67 sequences. Surveys of SSU rRNA genes in terrestrial habitats indicate that environmental  
68 variables including temperature (Fierer *et al.*, 2009; Miller *et al.*, 2009), pH (Fierer and Jackson,

69 2006; Lauber *et al.*, 2009; Rousk *et al.*, 2010), and salinity (Lozupone and Knight, 2007) are  
70 more important than geographic distance in determining patterns of microbial diversity and  
71 biogeography. However, SSU rRNA gene sequences have an extremely low rate of nucleotide  
72 substitution, and the formation of discrete taxonomic units as defined by this locus (i.e.  
73 Operational Taxonomic Units defined at 97% nucleotide identity) requires millions of years  
74 (Ochman and Wilson, 1987; Ochman *et al.*, 1999). Hence, microbes with similar or even  
75 identical SSU rRNA genes can have extensive genomic and ecological diversity (Welch *et al.*,  
76 2002; Jaspers and Overmann, 2004) which far exceeds the diversity found within plant and  
77 animal species. Neutral processes that drive patterns of biogeography, such as dispersal  
78 limitation and genetic drift, can only be detected using genetic techniques that have high  
79 resolution (Green and Bohannan, 2006; Hanson *et al.*, 2012). Fortunately, the evolutionary and  
80 ecological forces that drive microbial biogeography are readily explored using geographically  
81 and ecologically explicit culture collections that can be characterized at high genetic resolution  
82 (Hunt *et al.*, 2008; Shapiro *et al.*, 2012).

83  
84 *Streptomyces* are spore forming bacteria ubiquitous in soils, and many species are easily  
85 cultured. Furthermore, *Streptomyces* species have high rates of gene exchange both within and  
86 between species (Doroghazi and Buckley, 2010). Hence this genus represents a useful model for  
87 examining limits on dispersal and gene flow in terrestrial bacterial communities. *Streptomyces*  
88 are gram-positive *Actinobacteria* (Kämpfer, 2006) known for their complex developmental  
89 cycle, which entails mycelial growth followed by formation of aerial hyphae and desiccation  
90 resistant spores which are readily dispersed (Keiser *et al.*, 2000). *Streptomyces* are able to  
91 degrade recalcitrant carbon molecules like cellulose and play an important role within the

92 terrestrial carbon cycle (McCarthy and Williams, 1992; Takasuka *et al.*, 2013). In addition,  
93 phytopathogenic *Streptomyces*, such as *S. scabies*, cause substantial economic losses in  
94 agriculture (Loria *et al.*, 2006; Labeda, 2011). Finally, *Streptomyces* are prolific producers of  
95 secondary metabolites, and most antibiotics we use today were discovered in this genus (Watve  
96 *et al.*, 2001). Despite their clinical, agricultural, and environmental importance, we still lack an  
97 evolutionary and ecological framework to understand *Streptomyces* biodiversity and  
98 biogeography.

99

100 *Streptomyces* diversity varies spatially, though the effects of geographic distance and ecological  
101 variation on *Streptomyces* diversity remains poorly resolved. *Streptomyces* genetic and  
102 phenotypic diversity can vary at small spatial scale (1 m<sup>2</sup>) in prairie soils (Davelos *et al.*, 2004a  
103 and 2004b) and across dune and beach habitats (60 m) (Antony-Babu *et al.*, 2008), suggesting  
104 that variation in local soil characteristics can select for species and populations with different  
105 ecological adaptations. There is also evidence that some *Streptomyces* species are endemic to  
106 North America or Central Asia, which suggests dispersal limitation at large scales (Wawrik *et al.*,  
107 2007). Analysis of genetic diversity within a single population of *Streptomyces pratensis*,  
108 isolated from soils that spanned 1,000 km, revealed a population in linkage equilibrium when  
109 assessed both by multi-locus sequence analysis (MLSA) and genome analysis (Doroghazi and  
110 Buckley, 2010 and 2014). This result indicates that either gene flow is unlimited in *S. pratensis*  
111 across large spatial scales, or that it has experienced an evolutionarily recent demographic  
112 expansion from a population that was once in linkage equilibrium. Furthermore, analysis of  
113 ancestral patterns of *Streptomyces* inter-species gene exchange suggests that the fixation of  
114 incongruent loci could be due to demographic range expansion into higher latitudes (Andam *et*

115 *al.*, 2015). These latter data suggest a role for both adaptive and neutral processes in governing  
116 the diversity and biogeography of *Streptomyces*, though the degree to which these forces  
117 constrain extant patterns of genetic diversity within the genus remain poorly described.

118

119 We evaluated *Streptomyces* biogeography by constructing an isolate collection from grassland  
120 sites spanning the United States of America. The most powerful approach for detecting neutral  
121 evolutionary processes associated with dispersal limitation is to examine patterns of  
122 biogeography across similar habitats (Hanson *et al.*, 2012). In a previous study which employed  
123 a single locus (*rpoB*), we observed that *Streptomyces* species diversity exhibited a significant  
124 distance decay relationship and was inversely correlated with latitude (Andam *et al.*, 2016).  
125 Evidence for a latitudinal diversity gradient coupled with evidence of demographic range  
126 expansion, while not conclusive, is consistent with predictions of phylogenetic niche  
127 conservatism (Wiens and Donoghue, 2004; Stevens, 2006) which posits that these  
128 biogeographical patterns result from the historical effects of changes in paleoclimate (Hewitt *et*  
129 *al.*, 1996, 2000, and 2004). The hypothesis of a latitudinal diversity gradient in *Streptomyces*  
130 predicts that, in addition to a gradient of species richness, there should also be latitudinal  
131 differences in gene flow and genetic diversity within populations. Here we investigate genetic  
132 diversity and geographic distribution within six species-like phylogenetic clusters, or  
133 phylogroups, to determine whether patterns of gene flow and diversity corroborate the hypothesis  
134 of a latitudinal diversity gradient for *Streptomyces*.

135

## 136 **Materials and Methods**

137 *Strain isolation and DNA extraction*

138 We assembled a culture collection of more than 1,000 *Streptomyces* from 15 sites across the  
139 United States with soil sampled at 0-5 cm depth (Andam *et al.*, 2016). Sites were selected to  
140 represent a narrow range of habitats dominated by perennial grasses and having neutral to  
141 slightly acidic pH (3.9-7.3). Soil was air dried, and *Streptomyces* strains were isolated on  
142 glycerol-arginine agar plates of pH 8.7 containing cycloheximide and Rose Bengal (El-Nakeeb  
143 and Lechevalier, 1963; Ottow, 1972) as previously described (Doroghazi and Buckley, 2010).  
144 DNA was extracted from purified cultures, which were grown by shaking at 30°C in liquid yeast  
145 extract-malt extract medium (YEME) containing 0.5% glycine (Kieser *et al.*, 2000), by using a  
146 standard phenol/chloroform/isoamyl alcohol protocol.

147

148 The genetic diversity of isolates was initially assessed using partial *rpoB* sequences.  
149 *Streptomyces* species are typically delineated by 0.007 nucleotide dissimilarity across MLSA loci  
150 (Rong and Huang, 2012). Since we were using only a single locus we elected to define species-  
151 like phylogenetic clusters, or phylogroups, at 0.01 patristic distances with RAMI (Pommier *et al.*,  
152 2009). Using this approach, we identified 107 phylogenetic clusters based on *rpoB* sequences.  
153 We selected six of these phylogroups for further analysis. MLSA was performed on 17-47  
154 isolates from each phylogroup. Phylogroup names are capitalized and based on a representative  
155 isolate; for example, phylogroup WA1063 is named for *Streptomyces* sp. wa1063. Isolates are  
156 identified with a lowercase letter code indicating site of origin followed by a strain number; for  
157 example, isolate wa1063 is strain 1063 isolated from Washington (WA) state.

158

### 159 *Multilocus sequence analysis (MLSA)*

160 We adapted the MLSA scheme developed for *Streptomyces* by Guo *et al.* (2008), which targets



161 the five housekeeping loci *atpD*, *gyrB*, *recA*, *rpoB*, and *trpB* as described in Doroghazi and  
162 Buckley (2010). Partial SSU rRNA sequences were amplified using universal primers (8F:  
163 AGAGTTTGATCCTGGCTCAG; 1492R: CGGTTACCTTGTTACGACTT). Reactions for  
164 Sanger sequencing were performed using forward primers for all loci except *rpoB*, for which the  
165 reverse primer was used. Trace files were uniformly screened using CAP3 (Huang and Madan,  
166 1999) interfaced with a Perl script. Sequences were aligned using MUSCLE (Edgar, 2004),  
167 trimmed to 431 bp, 415 bp, 446 bp, 557 bp, and 489 bp, for genes *atpD*, *gyrB*, *recA*, *rpoB*, *trpB*,  
168 respectively, and concatenated consistent with the genomic order in *Streptomyces coelicolor*  
169 A3(2). SSU rRNA alignments were trimmed to 357 bp. Gene sequences are available on  
170 GenBank with accession numbers XXXX-XXXX.

171  
172 Good's coverage estimation and haplotype rarefaction was determined using mothur (Schloss *et*  
173 *al.*, 2009). DNA polymorphism statistics including: number of segregating sites, nucleotide  
174 diversity, and Tajima's D, were determined with DnaSP v5 (Librado and Rozas, 2009) and LDhat  
175 (McVean *et al.*, 2002). Population scaled mutation rates (Watterson's theta;  $\theta_w = 2N_e\mu$ ),  
176 recombination or gene conversion rates ( $\rho = 2N_e r/2$ ), and relative rates of recombination ( $\rho/\theta_w$ )  
177 were estimated using LDhat (McVean *et al.*, 2002) and are expressed per nucleotide site. The  
178 standard index of association ( $I_A$ ) was calculated from allelic data with LIAN v3.5 (Haubold and  
179 Hudson, 2000) using the Monte-Carlo test and 100 iterations. The pairwise homoplasy index  
180 (PHI) statistic was determined using PhiPack (Bruen *et al.*, 2006), and statistical significance  
181 was evaluated under a null hypothesis of no recombination. Sequence identity across  
182 phylogroups was calculated with mothur (Shloss *et al.*, 2009)

183

184 *Phylogeny reconstruction*

185 Maximum likelihood (ML) trees were constructed from the nucleotide sequences of individual  
186 and concatenated MLSA loci using the generalized time reversible nucleotide substitution model  
187 (Tavaré, 1986) with gamma distributed rate heterogeneity among sites (GTRGAMMA)  
188 supported in RAxML v7.3.0 (Stamatakis, 2006). Bootstrap support was determined for the  
189 highest-scoring ML tree of 20 iterations, and the number of bootstrap replicates was determined  
190 using the extended majority rule (autoMRE) convergence criteria (Pattengale *et al.*, 2010). Root  
191 placement is defined by *Mycobacterium smegmatis*. Significant phylogenetic incongruence  
192 between loci was determined using the Shimodaira-Hasegawa test (Shimodaira and Hasegawa,  
193 1999) implemented in the R package phangorn (Schliep, 2011).

194

195 *Population structure*

196 Concatenated MLSA sequences were analyzed using Structure v2.3.3 (Pritchard *et al.*, 2000) to  
197 examine population affiliation, subdivision, and admixture within and between phylogroups.  
198 Structure was run using an admixture model with a burn-in length of  $1.0E^6$  and  $3.0E^6$  replicates.  
199 The most probable number of sub-populations (k) was chosen using the Evanno method (Evanno  
200 *et al.*, 2005) from 10 independent runs with  $k = 1$  through  $k = 6$  within phylogroups, and through  
201  $k = 8$  between phylogroups implemented by Structure Harvester (Earl and vonHoldt, 2012).  
202 After choosing the most probable k-value, the program Clumpp was used to permute outputs of  
203 the independent runs (Jakobsson and Rosenberg, 2007).

204

205 *Patterns of dispersal and gene flow*

206 We used permutation tests to evaluate whether phylogroup distribution across sites could be

207 explained by panmixia. We compared the observed distributions to those expected under a  
208 random distribution model using 1,000 permutations to assess significance. In addition,  
209 correlations between geographic distance and allele composition between sites were assessed  
210 using Mantel and partial Mantel tests (Mantel, 1967; Smouse *et al.*, 1986). These tests were  
211 performed with the R package *ecodist* (Goslee and Urban, 2007) using the Pearson correlation  
212 method and 1,000 permutations. Bray-Curtis dissimilarity was calculated from unique allele  
213 composition across sites.

214

215 Haplotype networks were created using a statistical parsimony procedure (Templeton *et al.*,  
216 1987; Templeton *et al.*, 1995) implemented in TCS v1.18 (Clement *et al.*, 2000). Nested clade  
217 information was used to infer processes that could explain the geographic and genetic  
218 distribution of sequences using the program GeoDis v2.2 (Posada *et al.*, 2000). Both TCS v1.18  
219 and GeoDis v2.2 were performed in ANeCA (Panchal, 2007).

220

## 221 **Results**

### 222 *Characterization of Streptomyces phylogroups*

223 We identified a total of 308 *Streptomyces* isolates representing the six targeted phylogroups, and  
224 these isolates spanned 13 sites (Figure 1, Table 1). The six phylogroups all share more than 97%  
225 nucleotide identity in their SSU rRNA genes and greater than 88% average nucleotide identity  
226 (ANI) across MLSA loci. Strains within each phylogroup share 99.4%-100% nucleotide identity  
227 in their SSU rRNA genes (Figure 2) and 97.6%-99.5% ANI across concatenated MLSA loci  
228 (Figure 1, Table 2). The genetic ancestry of phylogroup members as determined by Structure is  
229 congruent with phylogroup boundaries defined by nucleotide cutoffs (Figure S1), and this

230 indicates that phylogroups approximate biological populations. There are a total of 122 unique  
231 MLSA haplotypes, with each phylogroup representing 15-26 haplotypes (Figure 1, Table 2).  
232 Good's coverage for each of the six phylogroups ranges from 0.88-1.0 for individual loci and  
233 0.94-1.0 for concatenated MLSA loci clustered at 99% nucleotide identity (Table S1). While  
234 unique haplotypes remain somewhat under sampled (Figure S2), allelic diversity at single loci is  
235 sampled well (Table S1). The per site nucleotide diversity ( $\pi$ ) of each phylogroup ranges from  
236 0.0026 to 0.011 (Table 2).

237

238 Four of our phylogroups do not match any *Streptomyces* species described in PubMLST (less  
239 than 97% ANI across MLSA loci, Figure S3A) (Jolley *et al.*, 2004). However, phylogroups  
240 WA1063 and MS152 affiliate with strains that belong to the *S. griseus* species cluster (Rong and  
241 Huang, 2010). Isolates in phylogroup WA1063 share greater than 99% MLSA identity with *S.*  
242 *anulatus* and *S. praecox* and form a monophyletic clade with these type strains (Figure S3A).  
243 Isolates in phylogroup MS152 share greater than 98% MLSA identity with *S. mediolani*, *S.*  
244 *albovinaceus*, and *S. griseinus* and form a paraphyletic clade that includes these type strains  
245 (Figure S3A).

246

247 We find evidence of horizontal gene transfer consistent with previous observations of  
248 *Streptomyces* species (Doroghazi and Buckley, 2010; Andam *et al.*, 2015). There is significant  
249 phylogenetic incongruence between MLSA loci (Figure S3, Table S2), suggesting that horizontal  
250 gene transfer has shaped the phylogeny of these groups. The six phylogroups present evidence of  
251 population structure and admixture, with each phylogroup composed of  $3.2 \pm 0.8$  (mean  $\pm$  s.d.)  
252 subpopulations (Figure 1). Evidence of admixture between populations suggests horizontal gene

253 transfer within phylogroups as has been previously described in *Streptomyces* (Doroghazi and  
254 Buckley, 2010). Likewise, there is evidence of significant levels of recombination within  
255 phylogroups MAN196, MS200, MS152, and F34 (PHI test,  $p < 0.05$ , Table 2). Phylogroups  
256 WA1063 and MS152 share two identical *atpD* alleles, with one of these alleles shared among  
257 strains isolated from MS, CA, WI (Brookfield), AK (Manley Hot Springs), and WA, and the  
258 other allele shared among strains isolated from MS and WI (Brookfield) (Figure 3, Figure S3B).  
259 It is not clear whether these alleles are shared as a result of contemporary horizontal gene  
260 transfer or vertical inheritance from the most recent common ancestor of the two clades, though  
261 the latter explanation is more parsimonious given the low level of polymorphism between the  
262 phylogroups.

263

#### 264 *Dispersal limitation*

265 Strains of the six phylogroups were obtained from soil samples from 13 sites of diverse  
266 geographic origin (Table 1). Each phylogroup was detected in  $4.2 \pm 0.4$  sites, and this  
267 distribution differs significantly from expectations for a random distribution of strains across  
268 sites (permutation test,  $p < 0.0005$ ), thereby rejecting the hypothesis of panmixia. Each  
269 phylogroup subpopulation was observed in  $2.2 \pm 0.9$  sites (mean  $\pm$  s.d.), and this value is lower  
270 than expected if subpopulations are randomly distributed across the sites occupied by each  
271 phylogroup (permutation test,  $p < 0.001$ ). These results indicate that phylogroup distribution is  
272 constrained geographically and that phylogroups have subpopulation structure that is also  
273 geographically explicit.

274

275 The geographic distribution of *Streptomyces* allelic diversity indicates dispersal limitation.

276 Identical alleles are shared among phylogroup members across each phylogroup's geographic  
277 range, which can exceed 5,000 km (Figure 3, Figure S3). However, dissimilarity in allele  
278 composition increases with geographic distance, and this result is significant (Bray-Curtis  
279 dissimilarity, Mantel  $r = 0.29$ ,  $p = 0.005$ ) (Figure S4). Hence, alleles are more likely shared  
280 between geographically similar sites indicating dispersal limitation with potential for long range  
281 dispersal. This result is significant for all individual loci except *recA* (Bray-Curtis dissimilarity,  
282 *aptD* Mantel  $r = 0.31$ ,  $p = 0.004$ ; *gyrB*  $r = 0.22$ ,  $p = 0.031$ ; *recA*  $r = 0.16$ ,  $p = 0.088$ ; *rpoB*  $r =$   
283  $0.27$ ,  $p = 0.004$ ; *trpB*  $r = 0.19$ ,  $p = 0.047$ ). Nearly all MLSA haplotypes (Figure 1, Figure 4) are  
284 unique to a single site, with the sole exception being a haplotype from phylogroup MS200 which  
285 is shared between strains ms53, ms30, and sun103 isolated from MS and WI (Sun Prairie). It is  
286 worth noting that all of the strains examined share > 97% SSU rRNA gene identity and these  
287 geographic patterns would not be detected through analysis of this locus. That is, everything  
288 would appear to be everywhere based on analysis of SSU rRNA genes.

289  
290 Analysis of haplotype distribution is consistent with diversification due to spatial isolation  
291 resulting from dispersal limitation. Nested clade analysis (NCA) establishes significant  
292 phylogeographic inferences for phylogroups MAN196, MAN125, WA1063, and MS152 (Figure  
293 4) but not for MS200 and F34. Nested clade phylogeographic inference postulates potential  
294 evolutionary and historical demographic processes that support extant patterns of diversity and  
295 biogeography. For instance, population subdivision of MAN125 across the Pacific Northwest  
296 (Figure 4A) and MAN196 between Maine and the Pacific Northwest (Figure 4B) is consistent  
297 with restricted gene flow due to historical long distance dispersal events. Likewise, population  
298 subdivision of MS152 and between the Southeast (MS and FL) and CA (Figure 4C) and WA1063

299 between WI (Brookfield) and OR (Figure 4D) is consistent with allopatric fragmentation.

300

### 301 *Latitudinal diversity gradient*

302 The distribution and diversity of the phylogroups reveals a latitudinal diversity gradient. Strains  
303 from MAN125, MAN196, WA1063 occur mostly north of 40°N latitude, while strains from  
304 MS200, MS152, F34 occur mostly south of this latitude (Table 1). This pattern of north/south  
305 partitioning is significant for each phylogroup when evaluated against the expectation of a  
306 random distribution across sites (permutation test,  $p < 0.01$  for each phylogroup after Bonferroni  
307 correction). Furthermore, partial Mantel tests were performed to evaluate the latitudinal and  
308 longitudinal vector components of geographic distance in relation to the allele composition of  
309 sites. There remains a significant relationship between allele composition and geographic  
310 distance when we control for longitude, (Mantel  $r = 0.23$ ,  $p = 0.022$ ), but this relationship is no  
311 longer significant when we control for latitude (Mantel  $r = 0.15$ ,  $p = 0.12$ ). This result indicates  
312 that allele composition changes more across latitude than it does across longitude. The latitudinal  
313 partitioning of alleles can be readily observed in the pattern of allele sharing between sites  
314 (Figure 3). Finally, we also observed a significant relationship between per site nucleotide  
315 diversity of phylogroup MLSA loci and the average latitude of sites in which they are found ( $R =$   
316  $-0.91$ ,  $p = 0.012$ ; Figure 5). This result indicates that phylogroups recovered from lower latitudes  
317 have higher genetic diversity than those recovered from higher latitudes.

318

### 319 **Discussion**

320 We used population genetic approaches to analyze spatial patterns of genetic diversity for six  
321 *Streptomyces* phylogroups isolated from geographically disparate but ecologically similar sites

322 across the United States (Table 1). The distribution of phylogroups is nonrandom and dispersal  
323 limited (Figure S4) with phylogroups inhabiting geographic ranges defined by latitude (Table 1,  
324 Figure 3). In addition, the genetic diversity of phylogroups is inversely proportional to the  
325 latitude from which they were isolated (Figure 5). These findings suggest that there are  
326 latitudinal barriers to dispersal, and that patterns of *Streptomyces* biogeography result from  
327 dispersal limitation and regional diversification due to genetic drift.

328

329 The phylogroups we describe are coherent phylogenetic groups that approximate biological  
330 populations (Figure S1). The members of each phylogroup share a distinguishable geographic  
331 range (Table 1, Figure 3), a recent common ancestor (Figure 1), greater than 97% ANI across  
332 MLSA loci (Table 2), and greater than 99.4% SSU rRNA gene nucleotide identity. Despite  
333 geographic and genetic subpopulation structure (Figure 1), phylogroup members frequently share  
334 identical alleles across demes. We infer the presence of recombination within all phylogroups  
335 using both nucleotide polymorphism and phylogenetic methods (Table 2, Table S2). For instance,  
336 MAN125 is nearly in linkage equilibrium ( $I_A = 0.09$ ) though its members span a geographic  
337 range of over 2,000 km across the Pacific Northwest. The observation of linkage equilibrium  
338 indicates that either the population lacks contemporary barriers to gene flow or the population  
339 has experienced a recent demographic expansion in which there has been insufficient time to  
340 accumulate mutations and linkage disequilibrium. Significant recombination and linkage  
341 equilibrium have also been observed in a *S. pratensis* population which spanned 1,000 km across  
342 sites present in North Carolina and northern New York (Doroghazi and Buckley, 2010 and 2014).

343



344 Regional patterns of biogeography among phylogroups are consistent with limitations to  
345 dispersal and gene flow. Allopatric processes like genetic drift can drive diversification between  
346 populations that are geographically isolated. The geographic distribution of our phylogroups is  
347 nonrandom, and we find regional subpopulation structure within phylogroups (Figure 1, Figure  
348 4). Although we find identical alleles in sites thousands of kilometers apart (Figure 3), MLSA  
349 haplotypes are not shared across sites (with the single exception of a haplotype shared between  
350 MS and WI) (Figure 4). We also observe a significant distance decay relationship for MLSA  
351 allele composition and geographic distance between sites (Figure S4). This data implies that  
352 while gene flow is moderate across the geographic range of a phylogroup, dispersal limitation  
353 and genetic drift have combined to produce regional populations whose distributions are  
354 constrained by latitude.

355  
356 *Streptomyces* phylogroup diversity is consistent with a latitudinal diversity gradient. We find that  
357 latitude is a significant predictor of gene flow (Figure 3). Furthermore, intra-phylogroup  
358 nucleotide diversity has a significant negative relationship with average latitude (Figure 5),  
359 which is congruous with the latitudinal diversity gradient observed for diverse macroorganisms  
360 (Hillebrand, 2004). There is conflicting evidence for latitudinal diversity gradients among  
361 microorganisms. Evidence for microbial latitudinal diversity gradients comes from marine  
362 systems (Fuhrman *et al.*, 2008; Sul *et al.*, 2013; Swan *et al.*, 2013), with contrary evidence  
363 obtained in terrestrial systems (Neufeld and Mohn, 2005; Chu *et al.*, 2010). However, most  
364 analyses of terrestrial bacterial biogeography are derived from analyses of SSU rRNA genes, and  
365 we show that analyses of SSU rRNA genes lack the sensitivity needed to detect the  
366 biogeographic patterns that we observe for *Streptomyces*.

367

368 Several hypotheses have been advanced to explain the formation of latitudinal diversity gradients  
369 (Wiens and Donoghue, 2004; Mittelbach *et al.*, 2007). Ecological hypotheses posit that factors  
370 such as carrying capacity, productivity, and niche availability vary across latitude and that these  
371 factors impose constraints on biodiversity (Currie *et al.*, 2004; Mouchet *et al.*, 2015).  
372 Evolutionary hypotheses invoke the positive relationship between temperature and the kinetics of  
373 metabolism to predict that evolutionary rates and cladogenesis correspond with temperature  
374 (Allen *et al.*, 2002). Historical hypotheses propose that the latitudinal diversity gradient is the  
375 product of historical geological, ecological, or demographic events that have influenced dispersal  
376 and diversification (Wiens and Donoghue, 2004; Stevens, 2006). For example, the influence of  
377 Pleistocene glacial events on the biogeography of diverse species of terrestrial and aquatic plants  
378 and animals is well documented (Soltis *et al.*, 1997; Bernatch and Wilson, 1998; Conroy and  
379 Cook, 2000; Milá *et al.*, 2006; Maggs *et al.*, 2008; Wilson and Veraguth, 2010). There is also  
380 evidence that Pleistocene glaciation events have impacted both microbial communities  
381 (Eisenlord *et al.*, 2012) and populations (Kenefic *et al.*, 2009; Mikheyev *et al.*, 2008).

382

383 The biogeography of our *Streptomyces* phylogroups is consistent with historical demography and  
384 dispersal limitation resulting in a contemporary latitudinal diversity gradient. Eisenlord *et al.*  
385 (2012) also found that dispersal limitations shape biogeography of Actinobacteria across a glacial  
386 retreat transect in Michigan. However, Fuhrman *et al.* (2008) gives strong support for the  
387 hypothesis that the increased kinetics of metabolism at higher temperatures result in greater  
388 bacterial species richness in marine communities at tropical latitudes. Since latitude is correlated  
389 with temperature, we cannot dismiss the influence of kinetics on driving the diversity gradient in

390 terrestrial *Streptomyces*. Furthermore, it is possible that unappreciated ecological variables, such  
391 as the species composition of perennial grass communities, could shape the diversity gradient.  
392 However, phylogroup MAN125 from the Pacific Northwest (Table 2) and *S. pratensis* from the  
393 Eastern United States (Doroghazi and Buckley, 2010 and 2014) each have populations in linkage  
394 equilibrium though occupying a large geographic range over which gene flow is limited (Figure  
395 3, Figure S4). The most parsimonious explanation for these conflicting results is that both taxa  
396 have independently experienced a recent demographic range expansion and that insufficient  
397 polymorphisms have accumulated since this expansion to allow for detection of disequilibrium  
398 due to isolation by distance. However, it is likely that latitudinal gradients are population specific  
399 and can arise from a combination of ecological, evolutionary, and historical processes.

400

401 The genetic consequences of glaciation events are described in depth by Hewitt (1996, 2000, and  
402 2004), and the population structure we observe in our *Streptomyces* phylogroups is consistent  
403 with post-glacial range expansion. One of the expectations of post-glacial expansion is “southern  
404 richness versus northern purity” (Hewitt, 2004). This is evident in the negative correlation we  
405 observe between latitude and the nucleotide diversity of phylogroups (Figure 5). Williams *et al.*  
406 (1998) justifies 40°N latitude as approximating late Pleistocene glacial and non-glacial regions  
407 with respect to species distributions in North America. Hence, the latitudinal delineation of allele  
408 distributions for *Streptomyces* phylogroups roughly corresponds to the extent of ice coverage  
409 during the late Pleistocene (Figure 3), which suggests historical population expansion from lower  
410 to higher latitudes.

411

412 Haplotype distributions of phylogroups MAN125, MAN196, WA1063, and MS152 are

413 consistent with allopatric diversification resulting from dispersal limitation (Figure 4). Haplotype  
414 nested clade analysis (NCA) predicts that historical dispersal events and range expansion across  
415 northern regions resulted in limits on dispersal during intermediate timescales allowing genetic  
416 drift to create the phylogroup population structures observed today. There is moderate criticism  
417 of NCA (Knowles and Maddison, 2002; Nielsen and Beumont, 2009) due to the subjective nature  
418 of inferring historical processes and the wide potential for stochastic processes creating similar  
419 patterns of biogeography. Yet these tools can provide useful hypotheses. Northern phylogroups  
420 MAN125 and MAN196 share a common ancestor with southern phylogroups MS200 and F34  
421 (Figure 1). The contemporary population structure of MAN125 and MAN196 is consistent with a  
422 historical range expansion from a common ancestor shared by both clades (Figure 1, Figure 4).  
423 Further population structure within each phylogroup likely resulted from barriers to gene flow  
424 and historical dispersal events across the Pacific Northwest for MAN125 (Figure 4A) and  
425 between Maine and the Pacific Northwest for MAN196 (Figure 4B). Analysis of haplotype  
426 distribution within WA1063 and MS152 is also consistent with diversification of populations as a  
427 result of gene flow limitation between the Midwest and Pacific Northwest for WA1063 (Figure  
428 4D) and between the Southeast and West for MS152 (Figure 4C).

429  
430 Phylogroups WA1063 and MS152 share a recent common ancestor (Figure 1, Figure S1) and  
431 even share two identical alleles at the *atpD* locus (Figure 3). These phylogroups have distinct,  
432 non-overlapping geographic ranges with WA1063 found in higher latitudes and MS152 in lower  
433 latitudes (Figure 3). WA1063 and MS152 have 0.0205 net nucleotide substitutions per site across  
434 MLSA loci. We evaluate the possible time range for divergence between WA1063 and MS152  
435 by extrapolating very roughly from the nucleotide substitution rate ( $\mu = 4.5 \times 10^{-9}$ ) and generation

436 time (100-300 generations per year) for *E. coli* (Ochman *et al.*, 1999), since corresponding  
437 values are not available for *Streptomyces* or their relatives. Based upon these gross  
438 approximations, we would estimate that WA1063 and MS152 diverged 15,000-50,000 years ago,  
439 corresponding to events in the late Pleistocene (Clayton *et al.*, 2006). Hence, it is likely that the  
440 identical *atpD* alleles found in both WA1063 and MS152 were inherited without modification  
441 from an ancestral population that both groups share (Figure S3B). If this is the case it suggests  
442 that the divergence of phylogroup WA1063 was driven by range expansion into higher latitudes  
443 and subsequent isolation by distance from the ancestral population it shares with phylogroup  
444 MS152.

445

446 Through population genetic analysis of six *Streptomyces* phylogroups, we find evidence for  
447 dispersal limitation associated with geographically explicit patterns of gene flow which manifest  
448 in a latitudinal gradient of nucleotide diversity. Furthermore, these data support the hypothesis  
449 that historical demographic processes influence the contemporary biogeography of *Streptomyces*.  
450 Due to their spore forming capabilities and potential for long range dispersal, *Streptomyces* are  
451 an ideal system for assessing limits on gene flow among terrestrial bacteria. We cannot yet  
452 determine whether the cause of dispersal limitation is due to limits on spore mobility or due to  
453 adaptive constraints as proposed by the hypothesis of phylogenetic niche conservatism. A better  
454 understanding of *Streptomyces* biogeography and the evolutionary processes driving population  
455 structure may ultimately assist in the discovery of novel genetic diversity and possibly novel  
456 antibiotics within this genus.

457

458

459 **Acknowledgements**

460 This material is based upon work supported by the National Science Foundation under Grants  
461 No. DEB-1050475 and DEB-1456821. We would like to thank Ashley Campbell for her help in  
462 generating MLSA sequences.

463

464 **References**

465 Allen AP, Brown JH, Gillooly JF. (2002). Global biodiversity, biochemical kinetics, and the  
466 energetic-equivalence rule. *Science* **297**: 1545–1548.

467 Andam CP, Choudoir MJ, Nguyen AVT, Park HS, Buckley DH. (2015). Contributions of  
468 ancestral inter-species recombination to the genetic diversity of extant *Streptomyces*  
469 lineages. *In Press*.

470 Andam CP, Doroghazi JR, Campbell AN, Kelly PJ, Choudoir MJ, Buckley DH. (2016). A  
471 latitudinal diversity gradient in terrestrial bacteria of the genus *Streptomyces*. *Personal*  
472 *communication*.

473 Antony-Babu S, Stach JEM, Goodfellow M. (2008). Genetic and phenotypic evidence for  
474 *Streptomyces griseus* ecovars isolated from a beach and dune sand system. *Antonie Van*  
475 *Leeuwenhoek* **94**: 63–74.

476 Bell T. (2010). Experimental tests of the bacterial distance-decay relationship. *ISME J* **4**: 1357–  
477 1365.

478 Bernatchez L, Wilson CC. (1998). Comparative phylogeography of Nearctic and Palearctic  
479 fishes. *Mol Ecol* **7**: 431–452.

- 480 Bissett A, Richardson AE, Baker G, Wakelin S, Thrall PH. (2010). Life history determines  
481 biogeographical patterns of soil bacterial communities over multiple spatial scales. *Mol*  
482 *Ecol* **19**: 4315–4327.
- 483 Boucher Y, Cordero OX, Takemura A, Hunt DE, Schliep K, Baptiste E, *et al.* (2011). Local  
484 mobile gene pools rapidly cross species boundaries to create endemism within global  
485 *Vibrio cholerae* populations. *mBio* **2**: e00335–10.
- 486 Bruen TC, Philippe H, Bryant D. (2005). A simple and robust statistical test for detecting the  
487 presence of recombination. *Genetics* **172**: 2665–2681.
- 488 Cadillo-Quiroz H, Didelot X, Held NL, Herrera A, Darling A, Reno ML, *et al.* (2012). Patterns  
489 of gene flow define species of thermophilic Archaea. *PLoS Biol* **10**: e1001265.
- 490 Cho J, Tiedje JM. (2000). Biogeography and degree of endemism of fluorescent *Pseudomonas*  
491 strains in soil. *Appl Environ Microbiol* **66**: 5448-5456.
- 492 Choudoir MJ, Campbell AN, Buckley DH. (2012). Grappling with Proteus: population level  
493 approaches to understanding microbial diversity. *Front Microbiol* **3**: 336.
- 494 Chu H, Fierer N, Lauber CL, Caporaso JG, Knight R, Grogan P. (2010). Soil bacterial diversity  
495 in the Arctic is not fundamentally different from that found in other biomes. *Environ*  
496 *Microbiol* **12**: 2998–3006.
- 497 Clayton L, Attig JW, Mickelson DM, Johnson MD, Syverson KM. (2006). Glaciation of  
498 Wisconsin.
- 499 Clement M, Posada D, Crandall KA. (2000). TCS: A computer program to estimate gene  
500 genealogies. *Mol Ecol* **9**: 1657–1659.
- 501 Coleman ML, Chisholm SW. (2010). Ecosystem-specific selection pressures revealed through  
502 comparative population genomics. *Proc Natl Acad Sci U S A* **107**: 18634–18639.

- 503 Conroy CJ, Cook JA. (2000). Phylogeography of a post-glacial colonizer: *Microtus longicaudus*  
504 (Rodentia: Muridae). *Mol Ecol* **9**: 165–175.
- 505 Currie DJ, Mittelbach GG, Cornell HV, Field R, Guégan JF, Hawkins BA, *et al.* (2004).  
506 Predictions and tests of climate-based hypotheses of broad-scale variation in taxonomic  
507 richness. *Ecol Lett* **7**: 1121–1134.
- 508 Davelos AL, Xiao K, Samac DA, Martin AP, Kinkel LL. (2004a). Spatial variation in  
509 *Streptomyces* genetic composition and diversity in a prairie soil. *Microb Ecol* **48**: 601–  
510 612.
- 511 Davelos AL, Kinkel LL, Samac DA. (2004b). Spatial variation in frequency and intensity of  
512 antibiotic interactions among *Streptomyces* from prairie soil. *Appl Environ Microbiol*  
513 **70**: 1051–1058.
- 514 Doroghazi JR, Buckley DH. (2014). Intraspecies comparison of *Streptomyces pratensis* genomes  
515 reveals high levels of recombination and gene conservation between strains of disparate  
516 geographic origin. *BMC Genomics* **15**: 970.
- 517 Doroghazi JR, Buckley DH. (2010). Widespread homologous recombination within and between  
518 *Streptomyces* species. *ISME J* **4**: 1136–1143.
- 519 Earl DA, vonHoldt BM. (2012). STRUCTURE HARVESTER: a website and program for  
520 visualizing STRUCTURE output and implementing the Evanno method. *Conserv Genet*  
521 *Resour* **4**: 359–361.
- 522 Edgar RC. (2004). MUSCLE: multiple sequence alignment with high accuracy and high  
523 throughput. *Nucleic Acid Res* **32**: 1792–1797.
- 524 Eisenlord SD, Zak DR, Upchurch RA. (2012). Dispersal limitation and the assembly of soil  
525 *Actinobacteria* communities in a long-term chronosequence. *Ecol Evol* **2**: 538–549.



- 526 El-Nakeeb MA, Lechevalier HA. (1963). Selective isolation of aerobic Actinomycetes. *Appl*  
527 *Microbiol* 11: 75–77.
- 528 Evanno G, Regnaut S, Goudet J. (2005). Detecting the number of clusters of individuals using  
529 the software STRUCTURE: a simulation study. *Mol Ecol* **14**: 2611–2620.
- 530 Fierer N, Carney KM, Horner-Devine MC, Megonigal JP. (2009). The biogeography of  
531 ammonia-oxidizing bacterial communities in soil. *Microb Ecol* **58**: 435–445.
- 532 Fierer N, Jackson RB. (2006). The diversity and biogeography of soil bacterial communities.  
533 *Proc Natl Acad Sci U S A* **103**: 626–631.
- 534 Finlay BJ. (2002). Global dispersal of free-living microbial eukaryote species. *Science* **296**:  
535 1061–1063.
- 536 Finlay BJ, Fenchel T. (2004). Cosmopolitan metapopulations of free-living microbial eukaryotes.  
537 *Protist* **155**: 237–244.
- 538 Fuhrman JA, Steele JA, Hewson I, Schwalbach MS, Brown M V, Green JL, *et al.* (2008). A  
539 latitudinal diversity gradient in planktonic marine bacteria. *Proc Natl Acad Sci U S A*  
540 **105**: 7774–7778.
- 541 Gibbons SM, Caporaso JG, Pirrung M, Field D, Knight R, Gilbert JA. (2013). Evidence for a  
542 persistent microbial seed bank throughout the global ocean. *Proc Natl Acad Sci U S A*  
543 **110**: 4651–4655.
- 544 Gilbert JA, Steele JA, Caporaso JG, Steinbrück L, Reeder J, Temperton B, *et al.* (2012).  
545 Defining seasonal marine microbial community dynamics. *ISME J* **6**: 298–308.
- 546 Goslee SC, Urban DL. (2007). The ecodist package for dissimilarity-based analysis of ecological  
547 data. *J Stat Softw* **22**: 1–19.

- 548 Green J, Bohannan BJM. (2006). Spatial scaling of microbial biodiversity. *Trends Ecol Evol* **21**:  
549 501–507.
- 550 Guo Y, Zheng W, Rong X, Huang Y. (2008). A multilocus phylogeny of the *Streptomyces*  
551 *griseus* 16S rRNA gene clade: use of multilocus sequence analysis for streptomycete  
552 systematics. *Int J Syst Evol Microbiol* **58**: 149–159.
- 553 Hanson CA, Fuhrman JA, Horner-Devine MC, Martiny JBH. (2012). Beyond biogeographic  
554 patterns: processes shaping the microbial landscape. *Nat Rev Microbiol* **10**: 497–506.
- 555 Hatosy SM, Martiny JBH, Sachdeva R, Steele J, Fuhrman JA, Martiny AC. (2013). Beta  
556 diversity of marine bacteria depends on temporal scale. *Ecology* **94**: 1898–1904.
- 557 Haubold B, Hudson RR. (2000). LIAN 3.0: detecting linkage disequilibrium in multilocus data.  
558 *Bioinformatics* **16**: 847–848.
- 559 Hewitt GM. (1996). Some genetic consequences of ice ages, and their role in divergence and  
560 speciation. *Biol J Linnean Soc* **58**: 247–276.
- 561 Hewitt G. (2000). The genetic legacy of the Quaternary ice ages. *Nature* **405**: 907–913.
- 562 Hewitt GM. (2004). Genetic consequences of climatic oscillations in the Quaternary. *Philos*  
563 *Trans R Soc Lond B Biol Sci* **359**: 183–195.
- 564 Hillebrand H. (2014). On the generality of the latitudinal diversity gradient. *Amer Nat* **163**: 192–  
565 211.
- 566 Huang X, Madan A. (1999). CAP3: a DNA sequence assembly program. *Genome Res* **9**: 868–  
567 677.
- 568 Hunt DE, David LA, Gevers D, Preheim SP, Alm EJ, Polz MF. (2008). Resource partitioning  
569 and sympatric differentiation among closely related bacterioplankton. *Science* **320**: 1081–  
570 1085.

- 571 Jakobsson M, Rosenberg NA. (2007). CLUMPP: a cluster matching and permutation program  
572 for dealing with label switching and multimodality in analysis of population structure.  
573 *Bioinformatics* **23**: 1801–1806.
- 574 Jaspers E, Overmann J. (2004). Ecological significance of microdiversity: identical 16S rRNA  
575 gene sequences can be found in bacteria with highly divergent genomes and  
576 ecophysologies. *Appl Environ Microbiol* **70**: 4831–4839.
- 577 Jolley KA, Chan MS, Maiden MCJ. (2004). mlstdbNet - distributed multi-locus sequence typing  
578 (MLST) databases. *BMC Bioinformatics* **5**: 86.
- 579 Kämpfer P. (2006). The family *Streptomycetaceae* Part I: Taxonomy. In: The Prokaryotes,  
580 Volume 3. Dworkin, M, Falkow, S, Rosenberg, E, Schliefer, K, & Stackebrandt, E (eds).  
581 Springer: New York, pp pp. 538–604.
- 582 Kenefic LJ, Pearson T, Okinaka RT, Schupp JM, Wagner DM, Hoffmaster AR, *et al.* (2009).  
583 Pre-Columbian origins for North American anthrax. *PLoS One* **4**: e4813.
- 584 Kieser T, Bibb M, Buttner M, Charter K, Hopwood D. (2000). Practical *Streptomyces* Genetics.  
585 John Innes Foundation: Norwich, UK.
- 586 Knowles L, Maddison W. (2002). Statistical phylogeography. *Mol Ecol* **11**: 2623–2635.
- 587 Labeda DP. (2011). Multilocus sequence analysis of phytopathogenic species of the genus  
588 *Streptomyces*. *Int J Syst Evol Microbiol* **61**: 2525–2531.
- 589 Lauber CL, Hamady M, Knight R, Fierer N. (2009). Pyrosequencing-based assessment of soil  
590 pH as a predictor of soil bacterial community structure at the continental scale. *Appl*  
591 *Environ Microbiol* **75**: 5111–5120.
- 592 Librado P, Rozas J. (2009). DnaSP v5: a software for comprehensive analysis of DNA  
593 polymorphism data. *Bioinformatics* **25**: 1451–1452.

- 594 Loria R, Kers J, Joshi M. (2006). Evolution of plant pathogenicity in *Streptomyces*. *Annu Rev*  
595 *Phytopathol* **44**: 469–487.
- 596 Lozupone CA, Knight R. (2007). Global patterns in bacterial diversity. *Proc Natl Acad Sci U S A*  
597 **104**: 11436–11440.
- 598 Maggs CA, Castilho R, Foltz D, Henzler C, Jolly MT, Kelly J, *et al.* (2008). Evaluating  
599 signatures of glacial refugia for North Atlantic benthic marine taxa. *Ecology* **89**: S108–  
600 S122.
- 601 Mantel N. (1967). The detection of disease clustering and a generalized regression approach.  
602 *Cancer Research* **27**: 209–220.
- 603 Martiny JBH, Bohannan BJM, Brown JH, Colwell RK, Fuhrman JA, Green JL, *et al.* (2006).  
604 Microbial biogeography: putting microorganisms on the map. *Nat Rev Microbiol* **4**: 102–  
605 112.
- 606 Martiny JBH, Eisen JA, Penn K, Allison SD, Horner-Devine MC. (2011). Drivers of bacterial  $\beta$  -  
607 diversity depend on spatial scale. *Proc Natl Acad Sci U S A* **108**: 7850–7854.
- 608 McCarthy AJ, Williams ST. (1992). Actinomycetes as agents of biodegradation in the  
609 environment - a review. *Gene* **115**: 189–192.
- 610 McVean G, Awadalla P, Fearnhead P. (2002). A coalescent-based method for detecting and  
611 estimating recombination from gene sequences. *Genetics* **160**: 1231–1241.
- 612 Mikheyev AS, Vo T, Mueller UG. (2008). Phylogeography of post-Pleistocene population  
613 expansion in a fungus-gardening ant and its microbial mutualists. *Mol Ecol* **17**: 4480–  
614 4488.
- 615 Mila B, Smith T, Wayne R. (2006). Postglacial population expansion drives the evolution of  
616 long-distance migration in a songbird. *Evolution* **60**: 2403–2409.

- 617 Miller SR, Strong AL, Jones KL, Ungerer MC. (2009). Bar-coded pyrosequencing reveals shared  
618 bacterial community properties along the temperature gradients of two alkaline hot  
619 springs in Yellowstone National Park. *Appl Environ Microbiol* **75**: 4565–4572.
- 620 Mittelbach GG, Schemske DW, Cornell H V., Allen AP, Brown JM, Bush MB, *et al.* (2007).  
621 Evolution and the latitudinal diversity gradient: speciation, extinction and biogeography.  
622 *Ecol Lett* **10**: 315–331.
- 623 Mouchet M, Levers C, Zupan L, Kuemmerle T, Plutzer C, Erb K, *et al.* (2015). Testing the  
624 effectiveness of environmental variables to explain European terrestrial vertebrate species  
625 richness across biogeographical scales. *PLoS One* **10**: e0131924.
- 626 Neufeld JD, Mohn WW. (2005). Unexpectedly high bacterial diversity in arctic tundra relative to  
627 boreal forest soils, revealed by serial analysis of ribosomal sequence tags. *Appl Environ*  
628 *Microbiol* **71**: 5710–5718.
- 629 Nielsen R, Beaumont MA. (2009). Statistical inferences in phylogeography. *Mol Ecol* **18**: 1034–  
630 1047.
- 631 Ochman H, Wilson AC. (1987). Evolution in bacteria: evidence for a universal substitution rate  
632 in cellular genomes. *J Mol Evol* **26**: 74–86.
- 633 Ochman H, Elwyn S, Moran NA. (1999). Calibrating bacterial evolution. *Proc Natl Acad Sci U S*  
634 *A* **96**: 12638–12643.
- 635 Ottow JCG. (2013). Rose bengal as a selective aid in the isolation of fungi and Actinomycetes  
636 from natural sources. *Mycologia* **64**: 304–315.
- 637 Panchal M. (2006). The automation of Nested Clade Phylogeographic Analysis. *Bioinformatics*  
638 **23**: 509–510.

- 639 Papke RT, Ramsing NB, Bateson MM, Ward DM. (2003). Geographical isolation in hot spring  
640 cyanobacteria. *Environ Microbiol* **5**: 650–659.
- 641 Pattengale ND, Alipour M, Bininda-Emonds ORP, Moret BME, Stamatakis A. (2010). How  
642 many bootstrap replicates are necessary? *J Comput Biol* **17**: 337–354.
- 643 Pearson T, Giffard P, Beckstrom-Sternberg S, Auerbach R, Hornstra H, Tuanyok A, *et al.*  
644 (2009). Phylogeographic reconstruction of a bacterial species with high levels of lateral  
645 gene transfer. *BMC Biol* **7**: 78.
- 646 Pommier T, Canback B, Lundberg P, Hagstrom A, Tunlid A. (2009). RAMI: a tool for  
647 identification and characterization of phylogenetic clusters in microbial communities.  
648 *Bioinformatics* **25**: 736–742.
- 649 Posada D, Crandall KA, Templeton AR. (2000). GeoDis: A program for the cladistic nested  
650 analysis of the geographical distribution of genetic haplotypes. *Mol Ecol* **9**: 487–488.
- 651 Pritchard JK, Stephens M, Donnelly P. (2000). Inference of population structure using multilocus  
652 genotype data. *Genetics* **155**: 945–959.
- 653 Rong X, Huang Y. (2010). Taxonomic evaluation of the *Streptomyces griseus* clade using  
654 multilocus sequence analysis and DNA-DNA hybridization, with proposal to combine 29  
655 species and three subspecies as 11 genomic species. *Int J Syst Evol Microbiol* **60**: 696–  
656 703.
- 657 Rong X, Huang Y. (2012). Taxonomic evaluation of the *Streptomyces hygrosopicus* clade using  
658 multilocus sequence analysis and DNA-DNA hybridization, validating the MLSA  
659 scheme for systematics of the whole genus. *Syst Appl Microbiol* **35**: 7–18.

- 660 Rousk J, Bååth E, Brookes PC, Lauber CL, Lozupone C, Caporaso JG, *et al.* (2010). Soil  
661 bacterial and fungal communities across a pH gradient in an arable soil. *ISME J* **4**: 1340–  
662 1351.
- 663 Schliep KP. (2011). phangorn: phylogenetic analysis in R. *Bioinformatics* **27**: 592–593.
- 664 Schloss PD, Westcott SL, Ryabin T, Hall JR, Hartmann M, Hollister EB, *et al.* (2009).  
665 Introducing mothur: open-source, platform-independent, community-supported software  
666 for describing and comparing microbial communities. *Appl Environ Microbiol* **75**: 7537–  
667 7541.
- 668 Shapiro BJ, Friedman J, Cordero OX, Preheim SP, Timberlake SC, Szabó G, *et al.* (2012).  
669 Population genomics of early events in the ecological differentiation of bacteria. *Science*  
670 **336**: 48–51.
- 671 Shimodaira H, Hasegawa M. (1999). Multiple comparisons of log-likelihoods with applications  
672 to phylogenetic inference. *Mol Biol Evol* **16**: 1114–1116.
- 673 Smouse PE, Long JC, Sokal RR. (1986). Multiple regression and correlation extensions of the  
674 Mantel test of matrix correspondence. *Syst Zool* **35**: 627–632.
- 675 Soltis D, Gitzendanner M, Strenge D, Soltis P. (1997). Chloroplast DNA intraspecific  
676 phylogeography of plants from the Pacific Northwest of North America. *Plant Syst Evol*  
677 **206**: 353–373.
- 678 Stamatakis A. (2006). RAxML-VI-HPC: maximum likelihood-based phylogenetic analyses with  
679 thousands of taxa and mixed models. *Bioinformatics* **22**: 2688–2690.
- 680 Stevens RD. (2006). Historical processes enhance patterns of diversity along latitudinal  
681 gradients. *Proc R Soc B Biol Sci* **273**: 2283–2289.

- 682 Sul WJ, Oliver TA, Ducklow HW, Amaral-zettler LA, Sogin ML. (2012). Marine bacteria  
683 exhibit a bipolar distribution. *Proc Natl Acad Sci U S A* **110**: 2342–2347.
- 684 Swan BK, Tupper B, Sczyrba A, Lauro FM, Martinez-Garcia M, González JM, *et al.* (2013).  
685 Prevalent genome streamlining and latitudinal divergence of planktonic bacteria in the  
686 surface ocean. *Proc Natl Acad Sci U S A* **110**: 11463–11468.
- 687 Takasuka TE, Book AJ, Lewin GR, Currie CR, Fox BG. (2013). Aerobic deconstruction of  
688 cellulosic biomass by an insect-associated *Streptomyces*. *Sci Rep* **3**: 1–10.
- 689 Tavaré S. (1986). Some probabilistic and statistical problems in the analysis of DNA sequences.  
690 *Am Math Soc Lect Math Life Sci* **17**: 57–86.
- 691 Telford RJ, Vandvik V, Birks HJB. (2006). Dispersal limitations matter for microbial  
692 morphospecies. *Science* **312**: 1015.
- 693 Templeton AR, Boerwinkle E, Sing CF. (1987). A cladistic analysis of phenotypic associations  
694 with haplotypes inferred from restriction endonuclease mapping. i. basic theory and an  
695 analysis of alcohol dehydrogenase activity in *Drosophila*. *Genetics* **117**: 343–351.
- 696 Templeton AR, Routman E, Phillips CA. (1995). Separating population structure from  
697 population history: a cladistic analysis of the geographical distribution of mitochondrial  
698 DNA haplotypes in the tiger salamander, *Ambystoma tigrinum*. *Genetics* **140**: 767–782.
- 699 Vos M, Velicer GJ. (2008). Isolation by distance in the spore-forming soil bacterium  
700 *Myxococcus xanthus*. *Curr Biol* **18**: 386–391.
- 701 Wallace A. (1878). Tropical nature, and other essays. Macmillan and Co.: London.
- 702 Watve M, Tickoo R, Jog M, Bhole B. (2001). How many antibiotics are produced by the genus  
703 *Streptomyces*? *Arch Microbiol* **176**: 386–390.



- 704 Wawrik B, Kutliev D, Abdivasievna UA, Kukor JJ, Zylstra GJ, Kerkhof L. (2007).  
705 Biogeography of Actinomycete communities and type ii polyketide synthase genes in  
706 soils collected in New Jersey and Central Asia. *Appl Environ Microbiol* **73**: 2982–2989.
- 707 Welch RA, Burland V, Plunkett G, Redford P, Roesch P, Rasko D, *et al.* (2002). Extensive  
708 mosaic structure revealed by the complete genome sequence of uropathogenic  
709 *Escherichia coli*. *Proc Natl Acad Sci U S A* **99**: 17020–17024.
- 710 Whitaker RJ, Grogan DW, Taylor JW. (2003). Geographic barriers isolate endemic populations  
711 of hyperthermophilic archaea. *Science* **301**: 976–978.
- 712 Wiens JJ, Donoghue MJ. (2004). Historical biogeography, ecology and species richness. *Trends*  
713 *Ecol Evol* **19**: 639–644.
- 714 Williams D, Dunkerley D, DeDecker P, Kershaw P, Chappell M. (1998). Quaternary  
715 environments. Arnold: London.
- 716 Wilson AB, Veraguth IE. (2010). The impact of Pleistocene glaciation across the range of a  
717 widespread European coastal species. *Mol Ecol* **19**: 4535–53.

## Figures and Tables

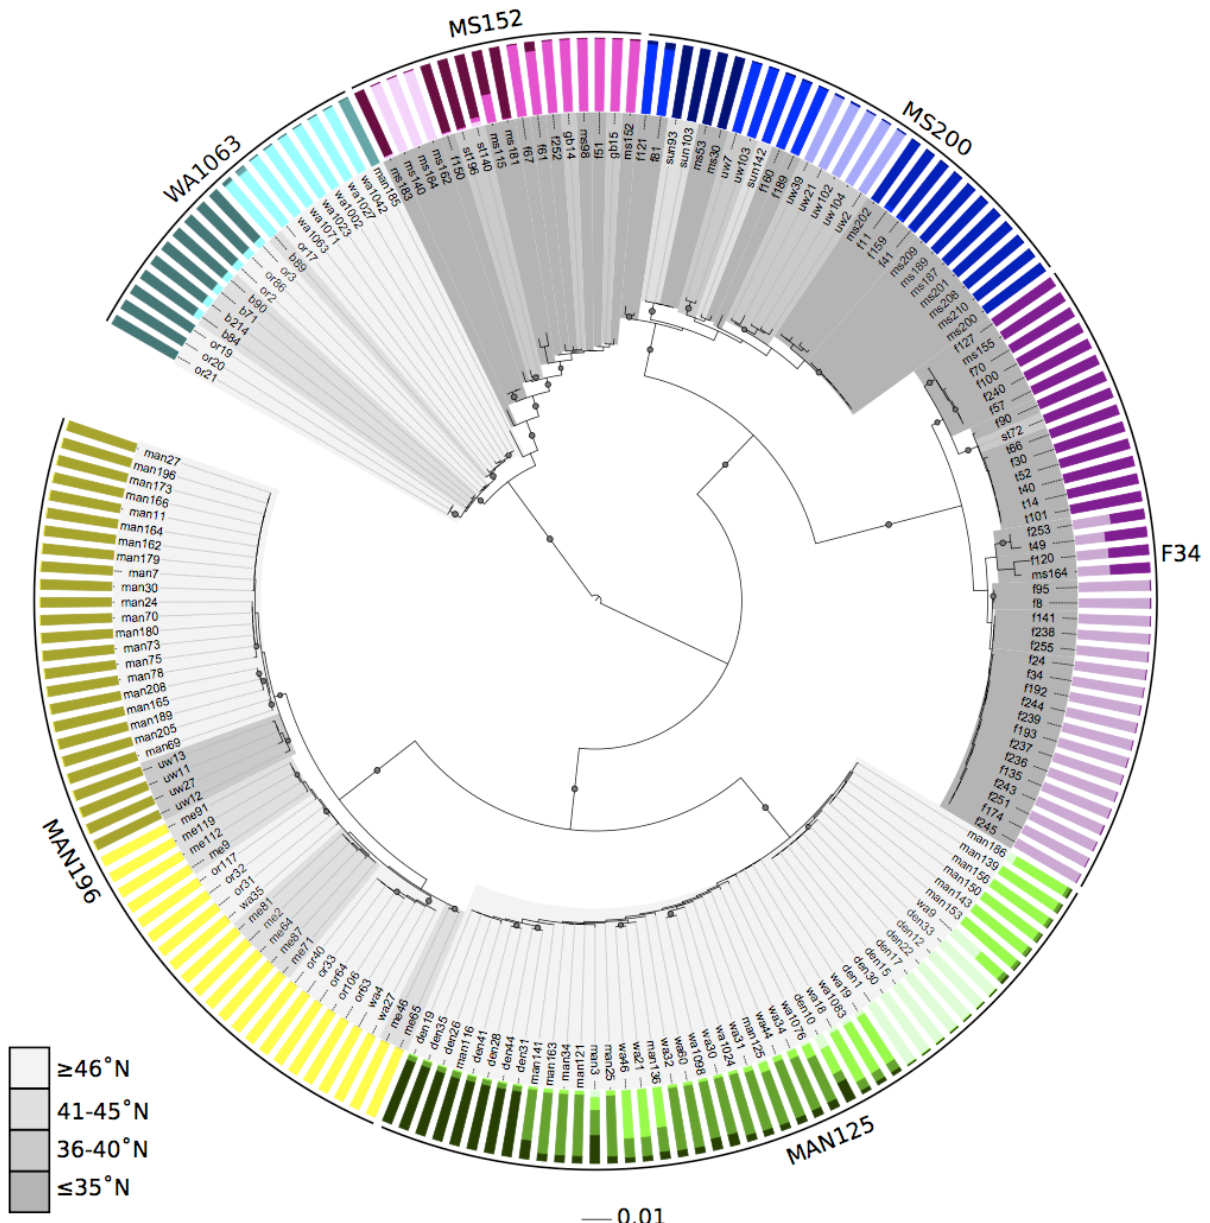

718 **Figure 1.** *Streptomyces* phylogroups have different geographic distributions defined by latitude  
719 with evidence for subpopulation structure and admixture. The colored bars in the outer ring  
720 indicate genetic contributions from different ancestral populations as inferred by Structure  
721 analysis. The shading of the inner ring indicates the latitude from which each strain was isolated  
722 according to the scale provided. The isolation site for each strain can be determined by isolate  
723 names as indicated in Table 1. The tree was constructed from concatenated MLSA loci  
724 nucleotide sequences using maximum likelihood with a GTRGAMMA evolution model. Scale  
725 bar represents nucleotide substitutions per site. The root was defined by *Mycobacterium*  
726 *smegmatis*. Nodes with bootstrap confidences > 80 are indicated with gray circles, and precise  
727 bootstrap values are found in Figure S3A.

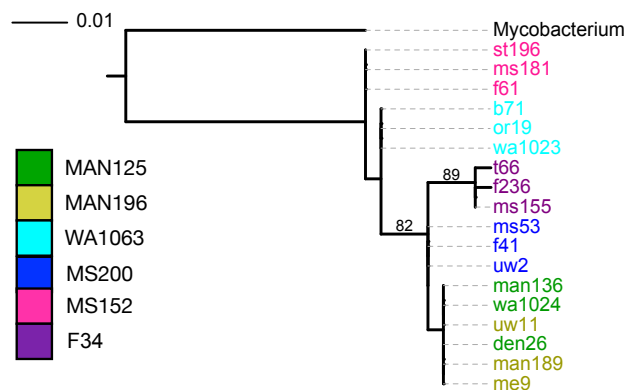

728 **Figure 2.** Dissimilarity in SSU rRNA genes is less than 3% across all six phylogroups and  
729 ranges from 0-0.6% for representatives within each phylogroup, revealing that this locus lacks  
730 sufficient sensitivity to examine the biogeographic distribution of *Streptomyces* phylogroups.  
731 The tree was constructed using maximum likelihood with a GTRGAMMA evolution model  
732 using partial SSU rRNA gene sequences from three representatives for each phylogroup. Scale

733 bar represents nucleotide substitutions per site. Branches with bootstrap support values greater  
734 than 75% are labeled, and the outgroup is *Mycobacterium smegmatis*. Strains are colored to  
735 reveal phylogroup membership as indicated in the color scale provided.

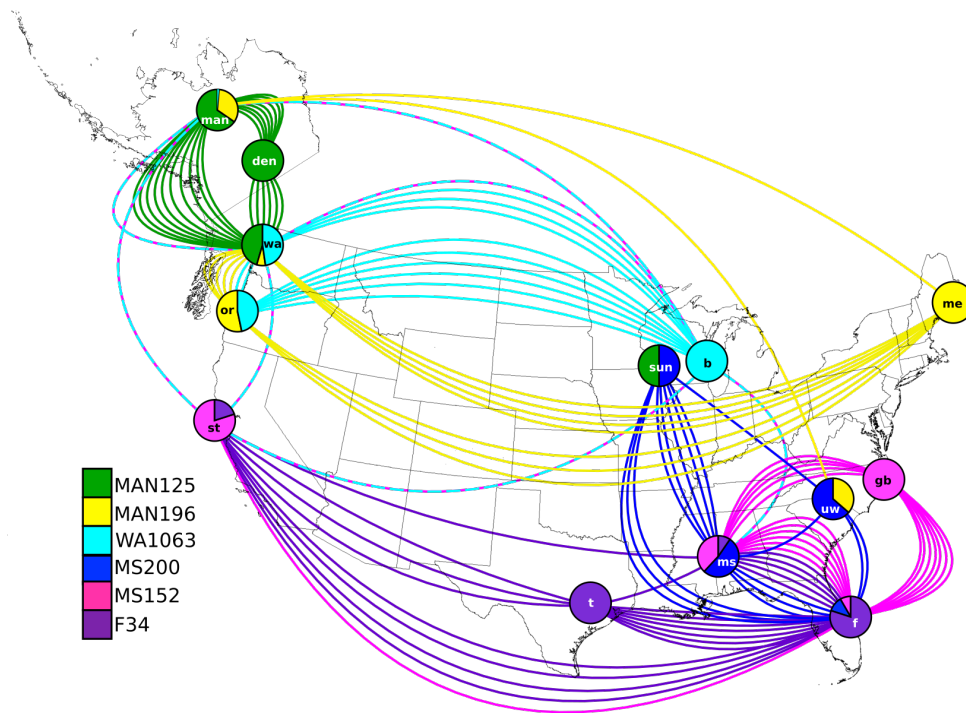

736 **Figure 3.** Identical MLSA alleles are frequently shared between sites. Circles depict sample sites  
737 and are labeled according to site code (Table 1). The relative abundance of each phylogroup at  
738 each site is indicated by color according to the legend, with raw counts provided in Table 1. Solid  
739 colored lines represent identical alleles shared by phylogroup members across sites. Dashed  
740 multicolored lines depict identical *atpD* alleles shared by strains in phylogroups WA1063 and  
741 MS152 (Figure S3B).

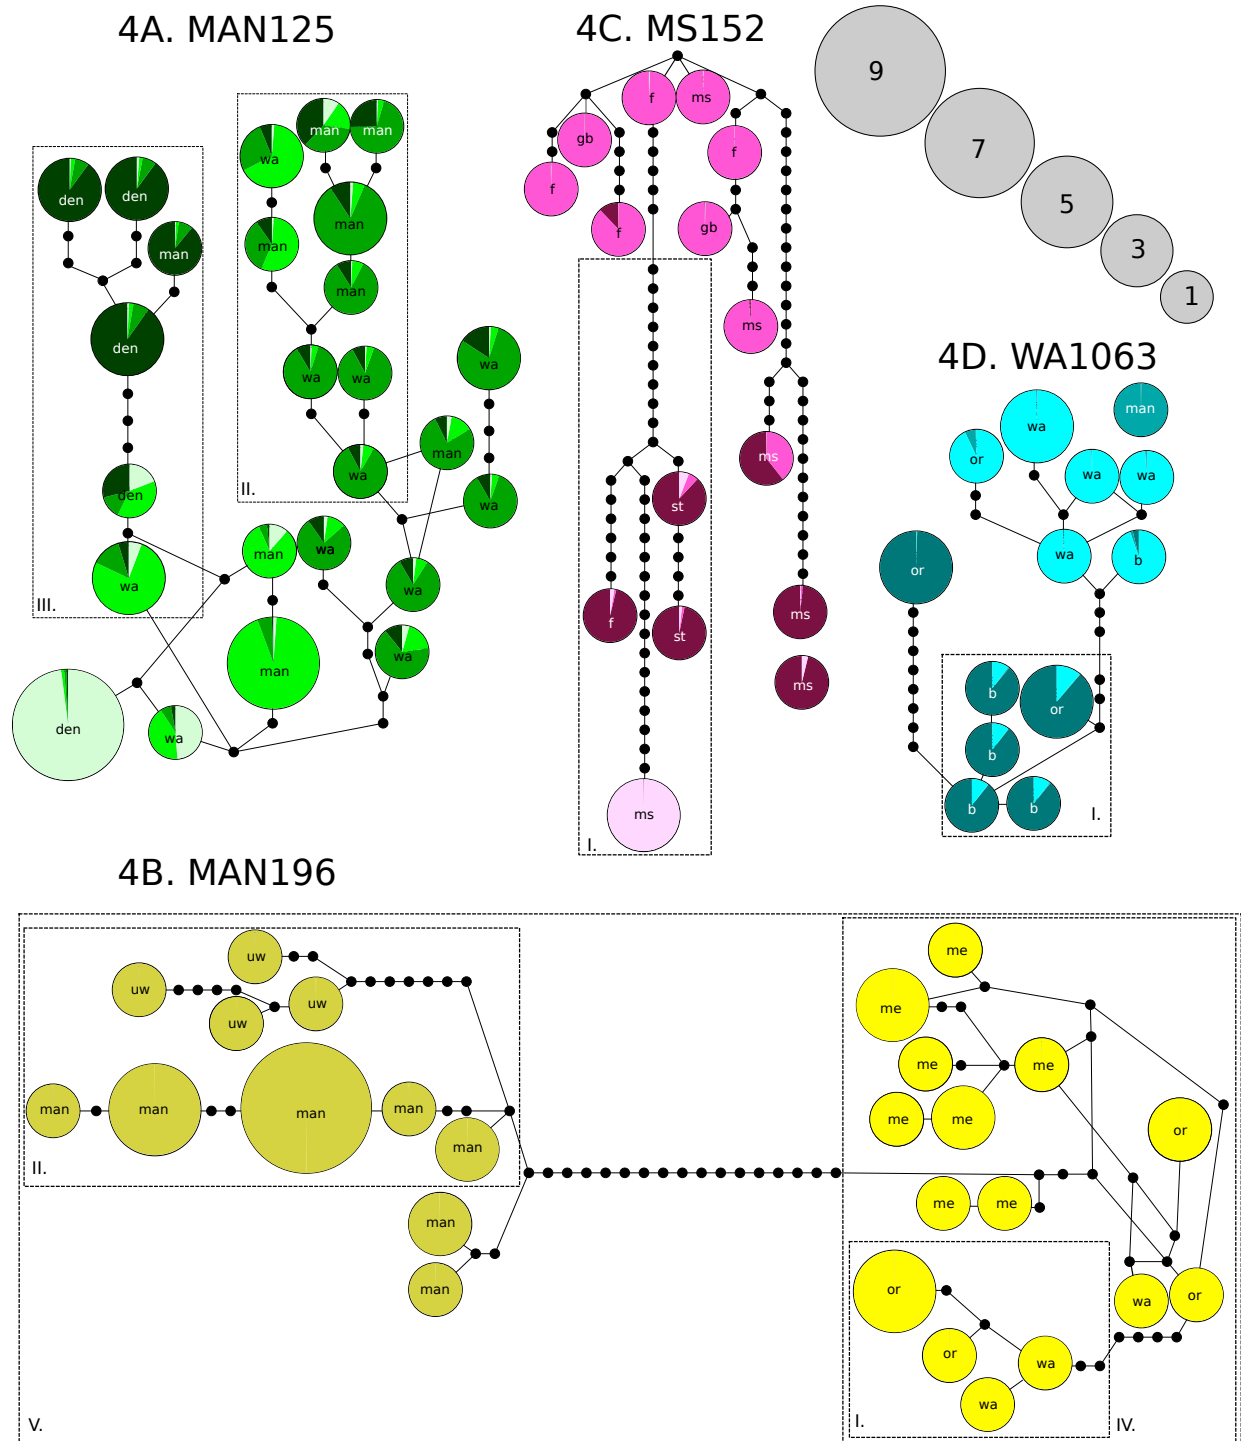

742 **Figure 4.** Haplotype networks are depicted for phylogroups MAN125 (4A), MAN196 (4B),  
743 MS152 (4C), WA1063 (4D). Circles represent unique MLSA haplotypes whose radius is  
744 proportional to the number of isolates sharing that haplotype, and colors correspond to strain

745 ancestry and subpopulation affiliation as determined by Structure analysis and defined in Figure  
746 1. Haplotypes are labeled with a letter code referring to sample site location as indicated in Table  
747 1. Black circles represent un-sampled, inferred haplotypes with each circle designating a single  
748 nucleotide polymorphism. The length of edges between nodes is uninformative. Dashed  
749 rectangles encompass clades that have significant phylogeographic inferences from nested clade  
750 analysis, as described in methods. Roman numerals correspond to the following inferences: I.  
751 Allopatric fragmentation; II. Long distance colonization and/or past fragmentation; III.  
752 Restricted gene flow with isolation by distance; IV. Restricted gene flow but with some long-  
753 distance gene flow over intermediate ranges not occupied by the species; or past gene flow  
754 followed by extinction of intermediate populations; V. Contiguous range expansion.

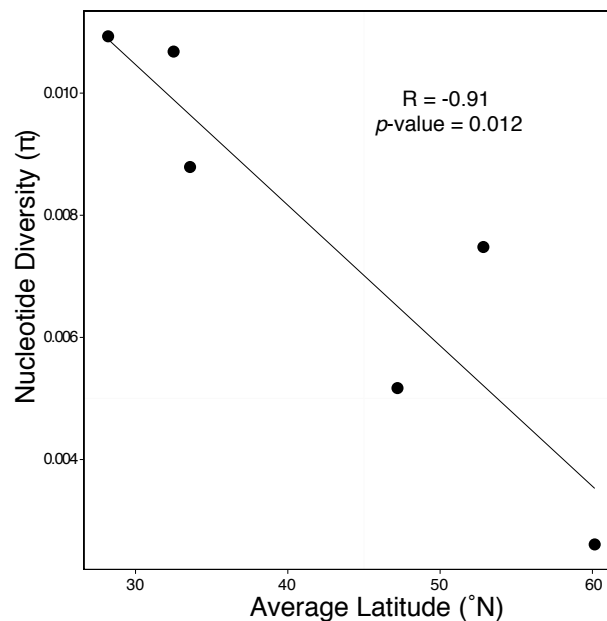

755 **Figure 5.** There is a significant inverse correlation between phylogroup average latitude and  
756 nucleotide diversity. Average latitude was determined using a weighted average based on the  
757 total number of isolates per site as indicated in Table 1. Nucleotide diversity was calculated using  
758 concatenated MLSA loci and is expressed per site.

759 **Table 1.** The six targeted phylogroups were observed in 13 sites. A total of 755 *Streptomyces*  
 760 strains were isolated from these sites, and 308 of these strains were found to represent the six  
 761 targeted phylogroups. The numbers of isolates per site that belonged to each of our target  
 762 phylogroups is indicated. Isolate names begin with a letter code referring to the isolation site.

| Site                   | Code | Latitude | Longitude | Isolates /Site | Isolates from <i>Streptomyces</i> sp. phylogroup |         |         |        |        |     |
|------------------------|------|----------|-----------|----------------|--------------------------------------------------|---------|---------|--------|--------|-----|
|                        |      |          |           |                | MAN 125                                          | MAN 196 | WA 1063 | MS 200 | MS 152 | F34 |
| Manley Hot Springs, AK | man  | 63.87°N  | -149.02°W | 95             | 51                                               | 26      | 1       |        |        |     |
| Denali Hwy, AK         | den  | 63.22°N  | -147.68°W | 40             | 40                                               |         |         |        |        |     |
| Bothell, WA            | wa   | 47.73°N  | -122.24°W | 105            | 21                                               | 5       | 21      |        |        |     |
| Astoria, OR            | or   | 46.18°N  | -123.85°W | 79             |                                                  | 8       | 7       |        |        |     |
| Kennebunk, ME          | me   | 43.4°N   | -70.54°W  | 85             |                                                  | 13      |         |        |        |     |
| Sun Prairie, WI        | sun  | 43.17°N  | -89.24°W  | 65             |                                                  |         |         | 3      |        |     |
| Brookfield, WI         | b    | 43.06°N  | -88.13°W  | 22             | 3                                                |         | 5       |        |        |     |
| Palo Alto, CA          | st   | 37.43°N  | -122.17°W | 34             |                                                  |         |         |        | 2      | 1   |
| Greensboro, NC         | gb   | 36.09°N  | -79.89°W  | 9              |                                                  | 1       |         |        | 2      |     |
| Troy (Uwharrie), NC    | uw   | 35.71°N  | -79.88°W  | 19             |                                                  | 4       |         | 7      |        |     |
| Starkville, MS         | ms   | 33.46°N  | -88.8°W   | 90             |                                                  |         |         | 11     | 8      | 2   |
| Austin, TX             | t    | 30.2°N   | -97.77°W  | 42             |                                                  |         |         |        |        | 6   |
| Fort Pierce, FL        | f    | 27.54°N  | -80.35°W  | 70             |                                                  |         |         | 7      | 5      | 48  |
| <b>Total</b>           |      |          |           | 755            | 115                                              | 57      | 34      | 28     | 17     | 57  |

763 **Table 2.** MLSA was performed on a total of 17-47 strains from each phylogroup. Summary  
 764 statistics for concatenated MLSA nucleotide sequences were determined as described in  
 765 methods. Phylogroup average latitude (Ave Lat) was determined using the total number of  
 766 isolates per phylogroup provided in Table 1. The standard index of association is zero for a  
 767 population in linkage equilibrium.

| Phylo-group | Ave Lat | n  | Haplo-types | Min ANI | S  | $\pi$  | Tajima's D | $\theta_w$ | $\rho$  | $\rho/\theta_w$ | $I_A$ | $\Phi_w$    |
|-------------|---------|----|-------------|---------|----|--------|------------|------------|---------|-----------------|-------|-------------|
| MAN125      | 60.15°N | 45 | 25          | 99.5    | 23 | 0.0026 | 0.53       | 0.0023     | 0.0094  | 4.18            | 0.09  | 2.95E-01    |
| MAN196      | 52.84°N | 47 | 26          | 98.5    | 65 | 0.0075 | 0.67       | 0.0063     | 0.00043 | 0.068           | 0.49  | 4.24E-02*   |
| WA1063      | 47.20°N | 19 | 13          | 98.1    | 63 | 0.0052 | -1.35      | 0.0077     | 0       | 0               | 0.43  | 4.33E-03    |
| MS200       | 33.58°N | 27 | 21          | 98.4    | 93 | 0.0088 | -0.58      | 0.0103     | 0.0017  | 0.17            | 0.39  | 1.33E-03**  |
| MS152       | 32.50°N | 17 | 15          | 97.6    | 96 | 0.0107 | -0.51      | 0.012      | 0.0013  | 0.11            | 0.35  | 1.078E-01** |
| F34         | 28.20°N | 36 | 22          | 97.7    | 93 | 0.0109 | 0.52       | 0.0096     | 0.0011  | 0.11            | 0.46  | 1.79E-01**  |

Ave Lat: average latitude of phylogroup members

n: number of isolates subsampled for MLSA

Min ANI: minimum percent pairwise average nucleotide identity (ANI) within phylogroup members

S: segregating sites

$\pi$ : per site nucleotide diversity

$\theta_w$ : per site Watterson's theta ( $2N_e\mu$ )

$\rho$ : per site rate of recombination/gene conversion ( $2N_e r/2$ )

$\rho/\theta_w$ : relative rate of recombination to mutation

$I_A$ : standard index of association

$\Phi_w$ : pairwise homoplasmy index (Phi) statistic with  $p$ -value < 0.05\*, 0.01\*\* under the null hypothesis of no recombination
